# Supplementary material for: Transcriptome profiling and histology changes insights into the molecular mechanisms of reproduction related genes and signal pathways in the Caspian Kutum (Rutilus frisii, Nordmann, 1840)
Source: Research Square preprint supplement (doi:10.21203/rs.3.rs-7779267/v1), 2025-10-20

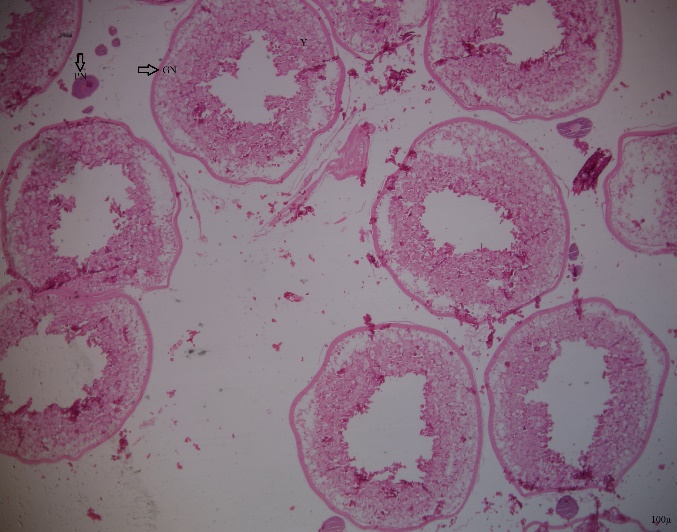

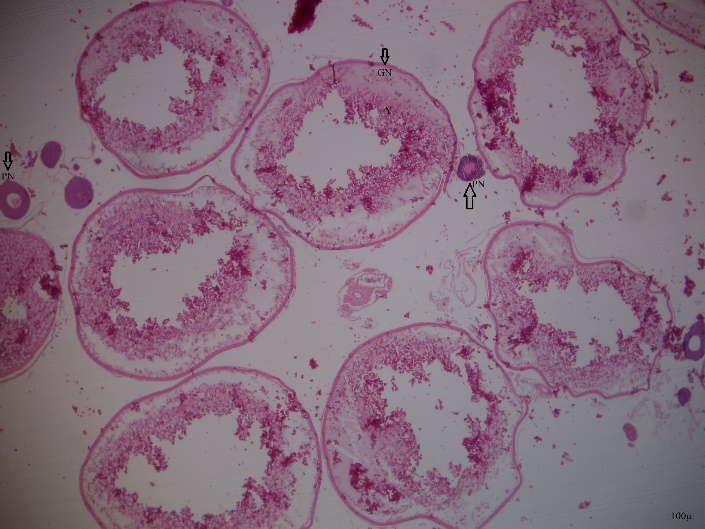


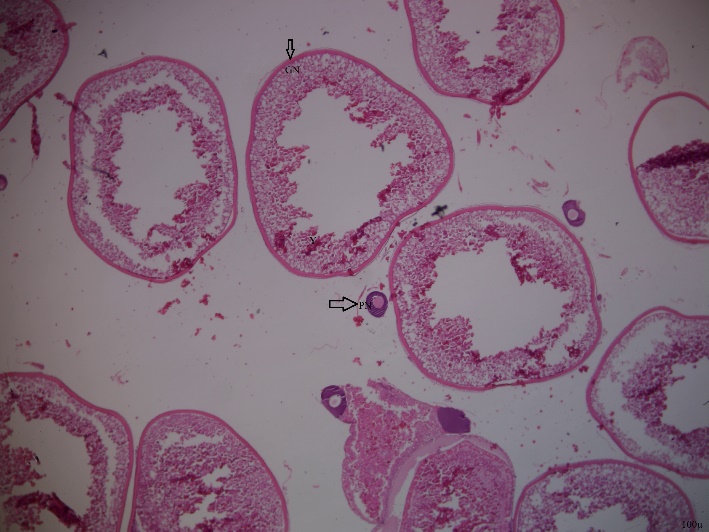


Fig-1: Ovarian histology of *R.frisii* autumn strain indicating level IV of maturation. (H & E 10x4x). GN: Granulosa cells, Y: Yolk, PN: Peri Nucleolus stage oocyte.


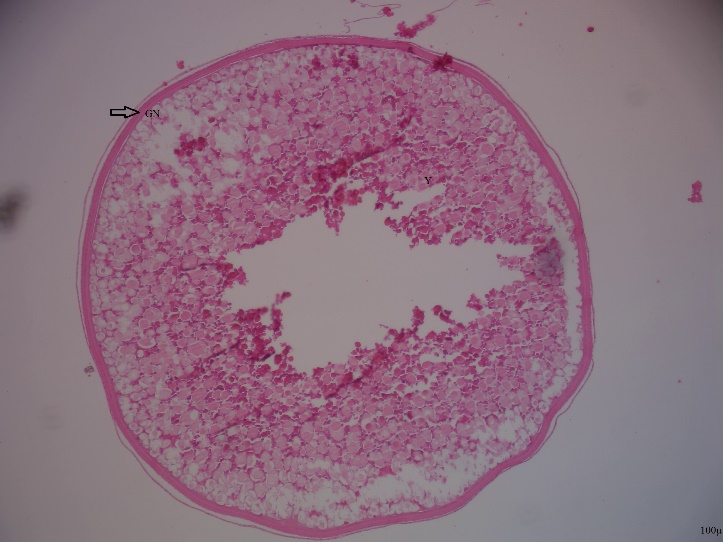

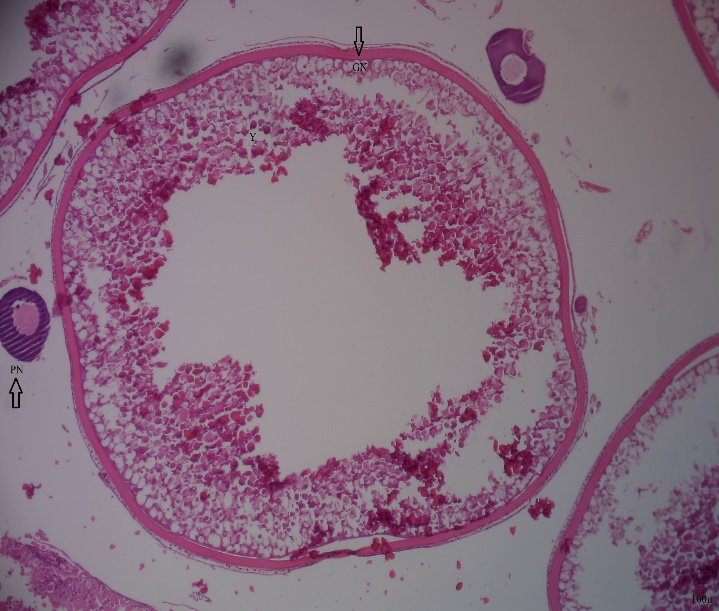

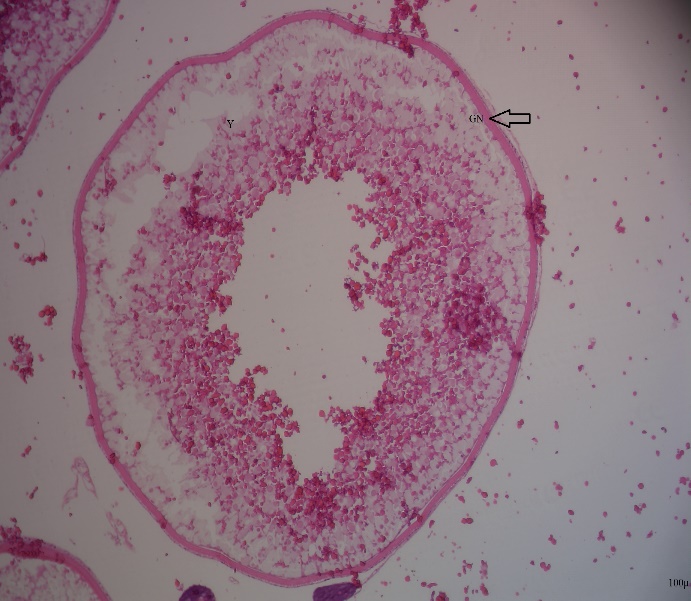


Fig-2: Ovarian histology of *R.frisii* autumn strain indicating level IV of maturation (H & E 10x10x). GN: Granulosa cells, Y: Yolk, PN: Peri Nucleolus stage oocyte.


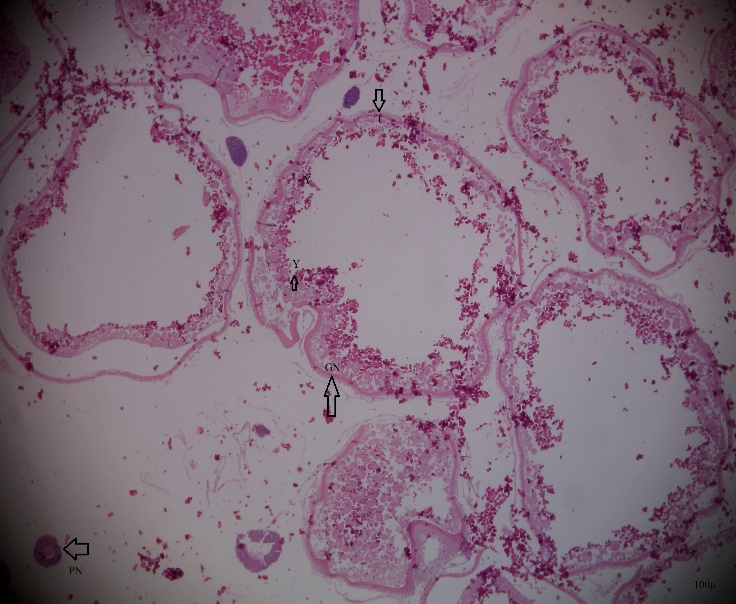

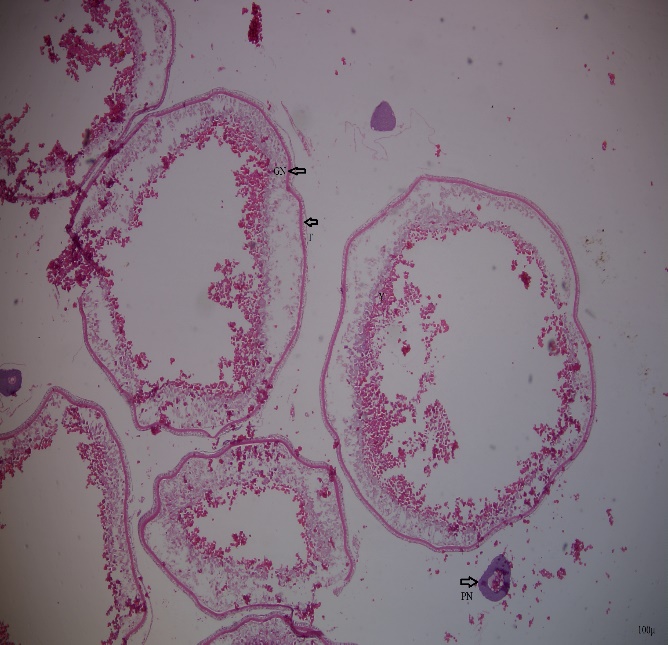

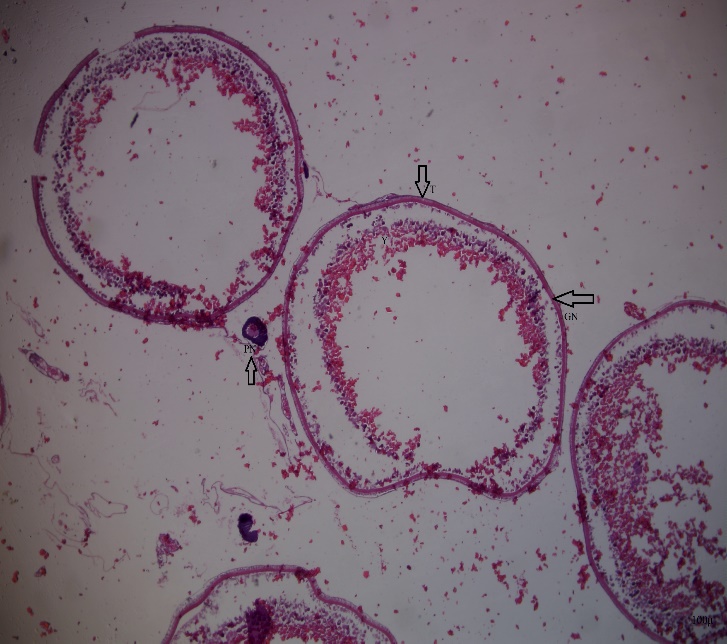


Fig-3: Ovarian histology of *R.frisii* spring strain with irregular follicular layer indicating level V of maturation. (H & E 10x4x). T: Techa cells, GN: Granulosa cells, Y: Yolk, PN: Peri Nucleolus stage oocyte.


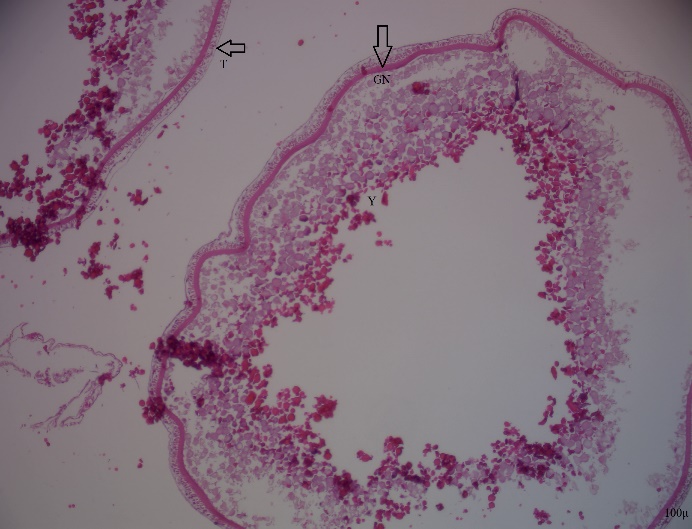

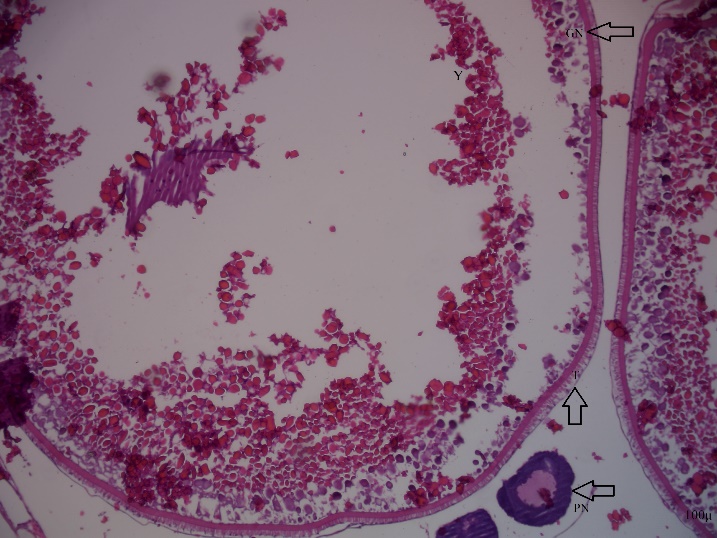


Fig-4: Ovarian histology of *R.frisii* spring strain with irregular follicular layer indicating level V of maturation. (H & E 10x4x). T: Techa cells, GN: Granulosa cells, Y: Yolk, PN: Peri Nucleolus stage oocyte.
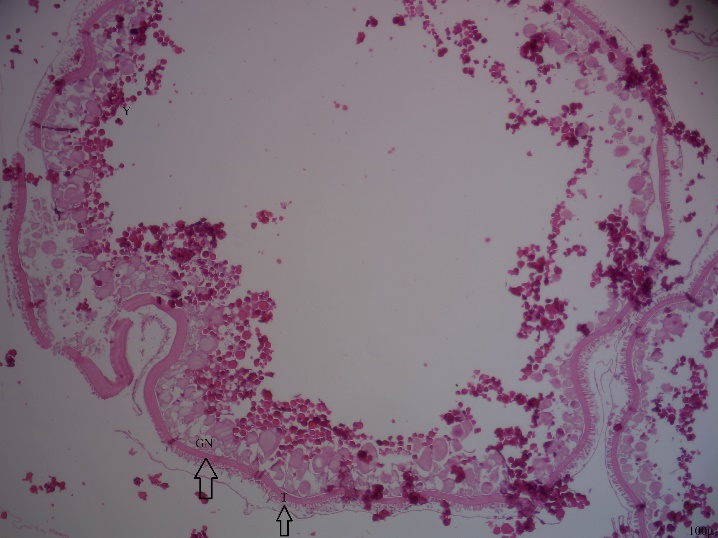

Supplement: Supplementary file 1 [file 205107106998aa06a124a766.docx]
