# Supplementary material for: Transcriptome profiling and histology changes insights into the molecular mechanisms of reproduction related genes and signal pathways in the Caspian Kutum (Rutilus frisii, Nordmann, 1840)
Source: Research Square preprint supplement (doi:10.21203/rs.3.rs-7779267/v1), 2025-10-20
Supplement: Supplementary file 4 [file 75c6d97a664df779534a2540.docx]

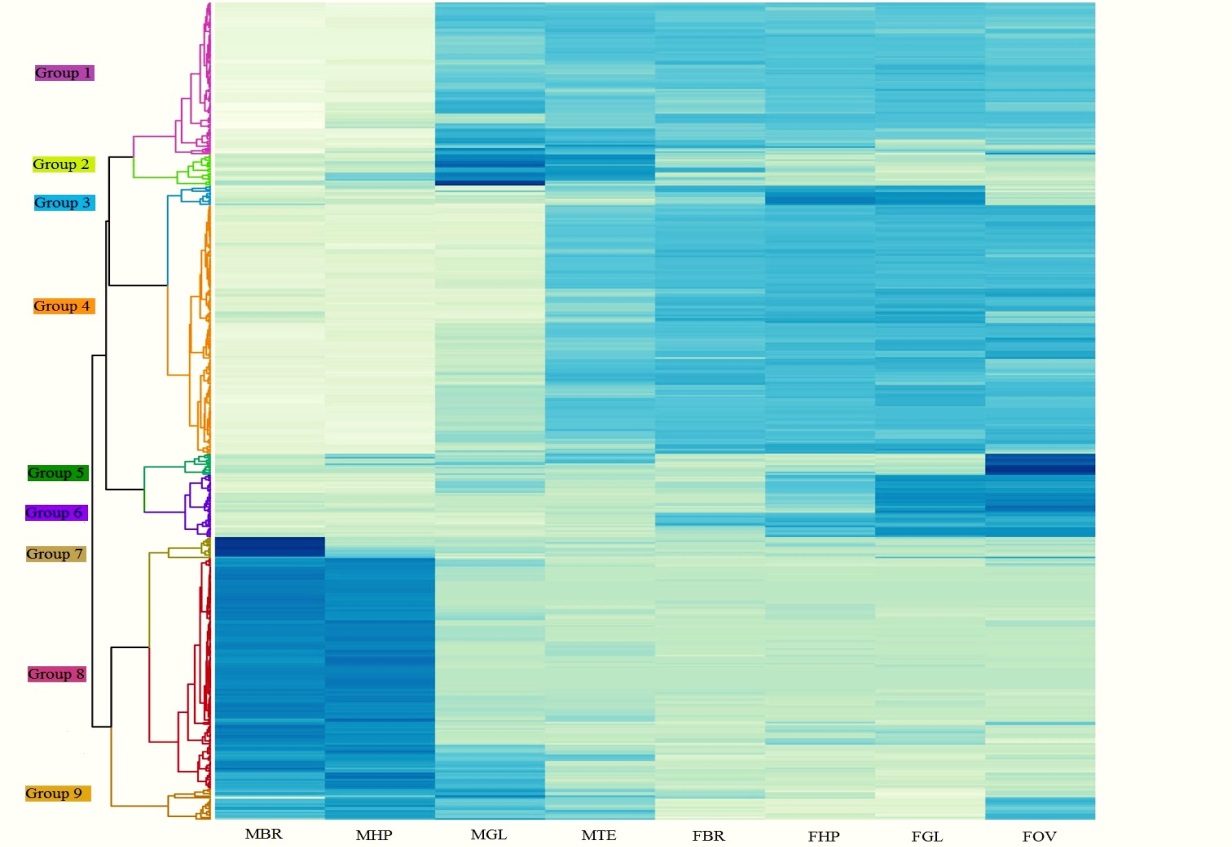


Fig S3: Hierarchical clustering Heatmap of the differentially expressed genes in the tissues investigated. A darker colour shows a greater expression level. Gene expression patterns in each tissue (row) were clustered into different expression groups according to the Pearson correlation coefficient. We used Euclidean distance to group different tissues.
