# Supplementary material for: Transcriptome profiling and histology changes insights into the molecular mechanisms of reproduction related genes and signal pathways in the Caspian Kutum (Rutilus frisii, Nordmann, 1840)
Source: Research Square preprint supplement (doi:10.21203/rs.3.rs-7779267/v1), 2025-10-20
Supplement: Supplementary file 5 [file 848e1bcc209332c61747461d.docx]

Table S3. Validation of putative SNPs in the transcripts of *Rutilus frisii*

| Transcript ID | Forward primer | Reverse primer | Number of validated SNPs | Number of predicted SNPs |
| --- | --- | --- | --- | --- |
| Unigene 086141 | CTACTCACAGCGAATGATAGG | ATGCTCAGTGCAGTCGTGACAT | 2 | 5 |
| Unigene 095315 | ATCAGAATCACGAGTGGTCA | CAGAATAGCTGCCTTATGCG | 2 | 3 |
| Unigene 118496 | TCACTAGCACTGCTCCTGA | TCGCTCTATGCGCAGTTCTAT | 3 | 4 |
| Unigene 121045 | GTCCCTGGTGTGTACTGCTG | GATGTTGCACCGATACGAGAT | 2 | 2 |
| Unigene 122651 | ACCTTCGTTTGTGCTCTGTA | CTGCATCTTGGTCGCACTG | 1 | 3 |
| Unigene 123684 | CATAGGATCTCACGCAGAT | CAGCTACTCCACATGTCGTCTC | 3 | 4 |
| Unigene 098397 | GTATGCATACGGACTAACGAG | CTGGCTTAATCATGCTCTGG | 3 | 3 |
| Unigene 103748 | GATCTCGGGCATATATGTGCA | GCTTCGTATTGCGAGACGCAGGC | 3 | 4 |
| Unigene 085645 | TCGGTCTGACGACATGTTAG | GTGAGAACGCTACTGAGTAC | 3 | 4 |
| Unigene 124920 | GCCTTGCGTAGGTCGATCAG | GTACATGGTAGTGGCTGAGTAGT | 3 | 4 |
| Unigene 125526 | GCATGGTGCGAGGCAGCCTA | ACGACCTTAGCTGACACAGC | 1 | 2 |
| Unigene130242 | TAGCAGCGTGCGTGAGACG | ACATTGTCGGTGTTTTACAGA | 3 | 4 |
