# Supplementary material for: Transcriptome profiling and histology changes insights into the molecular mechanisms of reproduction related genes and signal pathways in the Caspian Kutum (Rutilus frisii, Nordmann, 1840)
Source: Research Square preprint supplement (doi:10.21203/rs.3.rs-7779267/v1), 2025-10-20
Supplement: Supplementary file 6 [file a5bcd01c32a531ea99d3d35f.docx]

Table S2. Frequency distribution of dinucleotide and trinucleotide SSR loci identified in *Rutilus frisii*

| **Repeat** | **5** | **6** | **7** | **8** | **9** | **10** | **>10** | Total | **Percent** |
| --- | --- | --- | --- | --- | --- | --- | --- | --- | --- |
| AG/CT | - | 1202 | 850 | 674 | 540 | 362 | 85 | 3713 | 25.37 |
| AC/GT | - | 1128 | 847 | 769 | 554 | 431 | 76 | 3805 | 26.00 |
| AT/AT | - | 952 | 733 | 617 | 492 | 130 | 22 | 2946 | 20.13 |
| GC/GC | - | 512 | 326 | 188 | 51 | 25 | 14 | 1116 | 7.63 |
| ACT/AGT | 515 | 257 | 105 | 12 | 5 | 0 | 2 | 896 | 6.12 |
| AAG/CTT | 439 | 152 | 88 | 6 | 0 | 0 | 1 | 686 | 4.69 |
| AAC/GTT | 328 | 177 | 60 | 12 | 0 | 0 | 0 | 577 | 3.94 |
| ACA/GGT | 219 | 75 | 11 | 0 | 0 | 0 | 0 | 305 | 2.08 |
| ACC/GGT | 145 | 81 | 10 | 0 | 0 | 0 | 0 | 236 | 1.61 |
| ACG/CGT | 98 | 52 | 36 | 0 | 2 | 0 | 1 | 189 | 1.29 |
| CCG/CGG | 63 | 34 | 5 | 0 | 0 | 0 | 0 | 102 | 0.70 |
| ATC/ATG | 38 | 22 | 2 | 1 | 0 | 0 | 0 | 63 | 0.43 |
