# Supplementary material for: Transcriptome profiling and histology changes insights into the molecular mechanisms of reproduction related genes and signal pathways in the Caspian Kutum (Rutilus frisii, Nordmann, 1840)
Source: Research Square preprint supplement (doi:10.21203/rs.3.rs-7779267/v1), 2025-10-20
Supplement: Supplementary file 8 [file de2b7a80ffc11cd54b5d4a9d.docx]

Table S1. Mapping results of six tissue samples of *Rutilus frisii*.

| **Reference sequence** |  |  |
| --- | --- | --- |
|  | total reads | 143,671,092 |
|  | total contigs | 149,857 |
| **RFS1** |  |  |
|  | total reads(paired) | 45,856,137 |
|  | reads mapped in pairs | 28,652,186 |
|  | reads mapped in broken pairs | 5,782,262 |
|  | reads not mapped | 6,645,479 |
| **RFS2** |  |  |
|  | total reads | 64,368,462 |
|  | reads mapped in pairs | 49,227,300 |
|  | reads mapped in broken pairs | 14,205,284 |
|  | reads not mapped | 9,108,145 |
| **RFS3** |  |  |
|  | total reads | 57,131,422 |
|  | reads mapped in pairs | 25,562,139 |
|  | reads mapped in broken pairs | 8,325,043 |
|  | reads not mapped | 5,279,392 |
| **RFA1** |  |  |
|  | total reads | 86,155,048 |
|  | reads mapped in pairs | 44,212,765 |
|  | reads mapped in broken pairs | 13,079,144 |
|  | reads not mapped | 9,588,075 |
|  |  |  |
| **RFA2** |  |  |
|  | total reads | 75,607,465 |
|  | reads mapped in pairs | 51,680,960 |
|  | reads mapped in broken pairs | 16,376,176 |
|  | reads not mapped | 14,799,042 |
| **RFA3** |  |  |
|  | total reads | 66,401,916 |
|  | reads mapped in pairs | 38,330,848 |
|  | reads mapped in broken pairs | 14,188,475 |
|  | reads not mapped | 10,072,183 |
|  |  |  |
