# Supplementary figures and images for: Transcriptome profiling and histology changes insights into the molecular mechanisms of reproduction related genes and signal pathways in the Caspian Kutum (Rutilus frisii, Nordmann, 1840)
Source: Research Square preprint supplement (doi:10.21203/rs.3.rs-7779267/v1), 2025-10-20

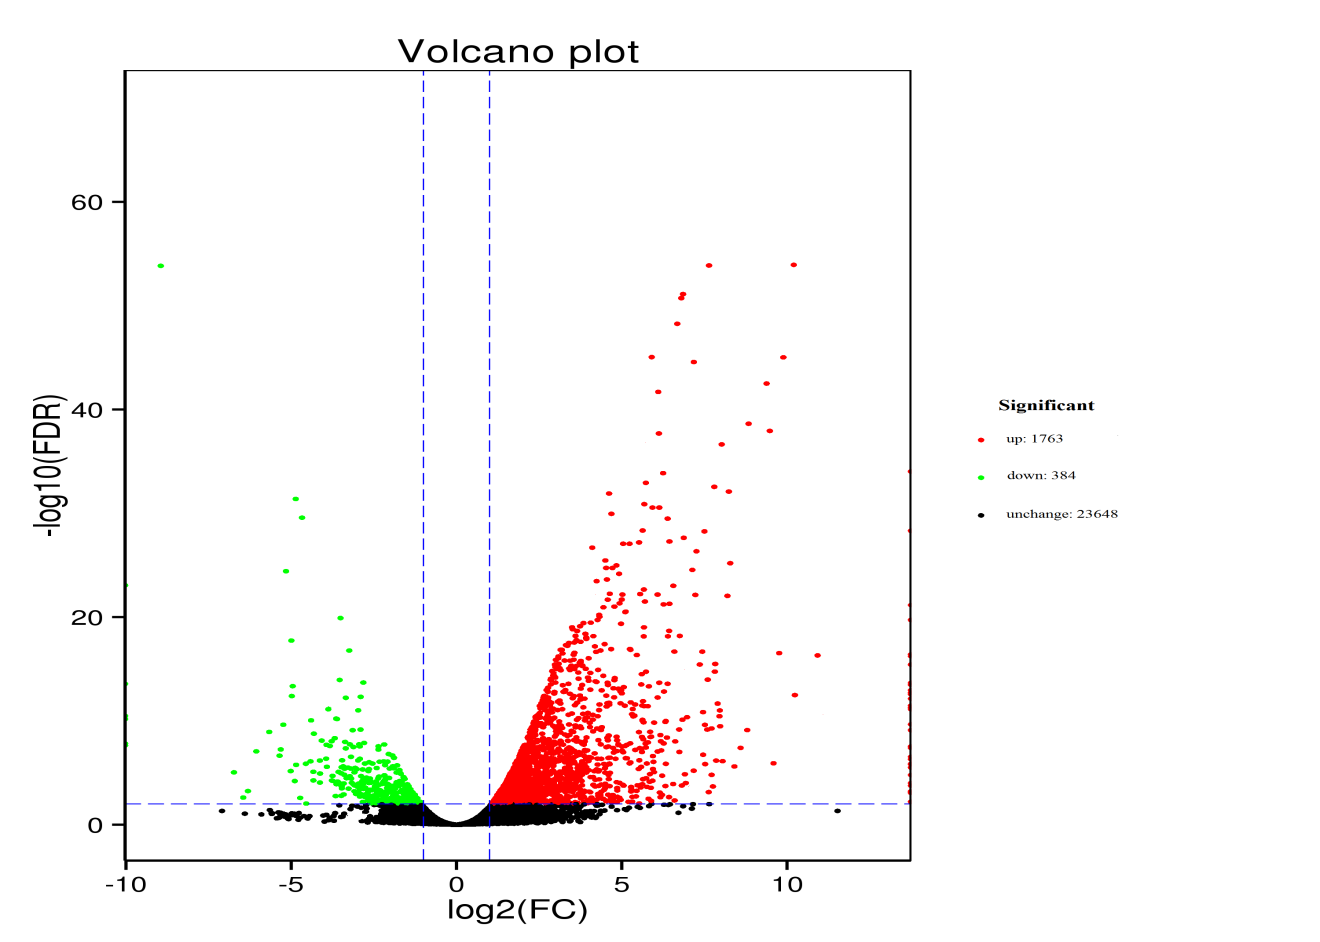


# Fig S4: Visualization of RNA-Seq results with Volcano Plot

Supplement: Supplementary file 2 [file 24d7f84e6707869a7bdee058.docx]

**
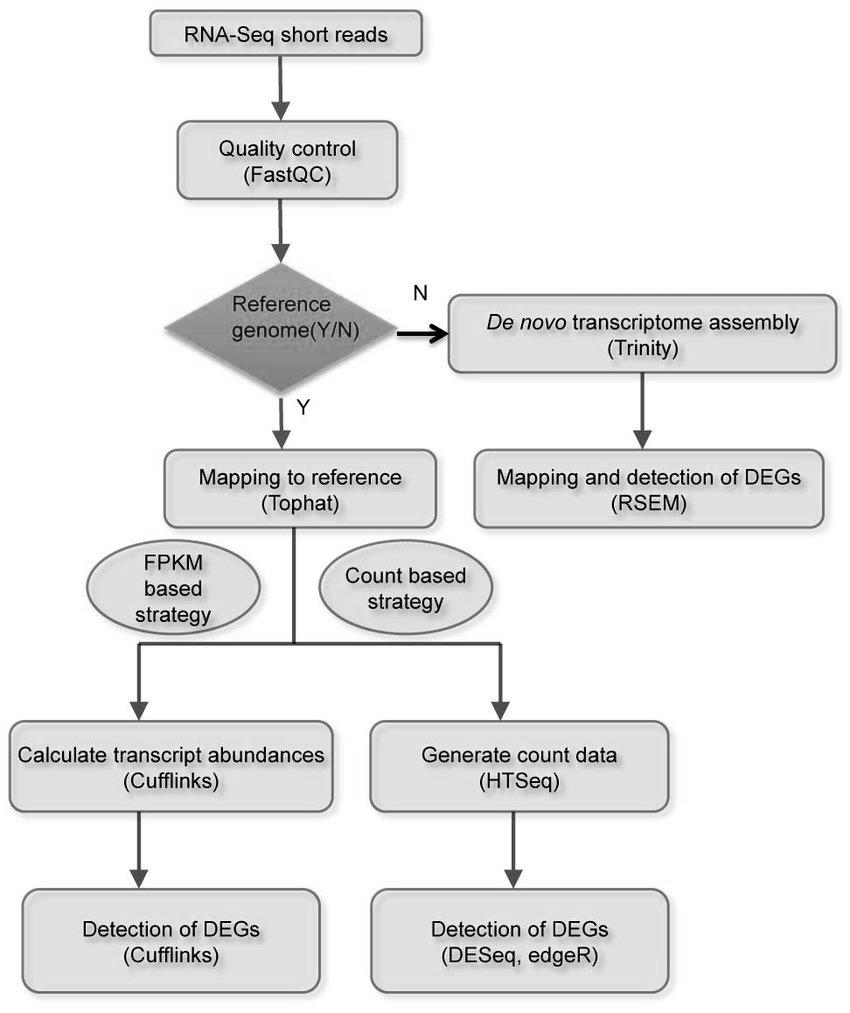
**

**
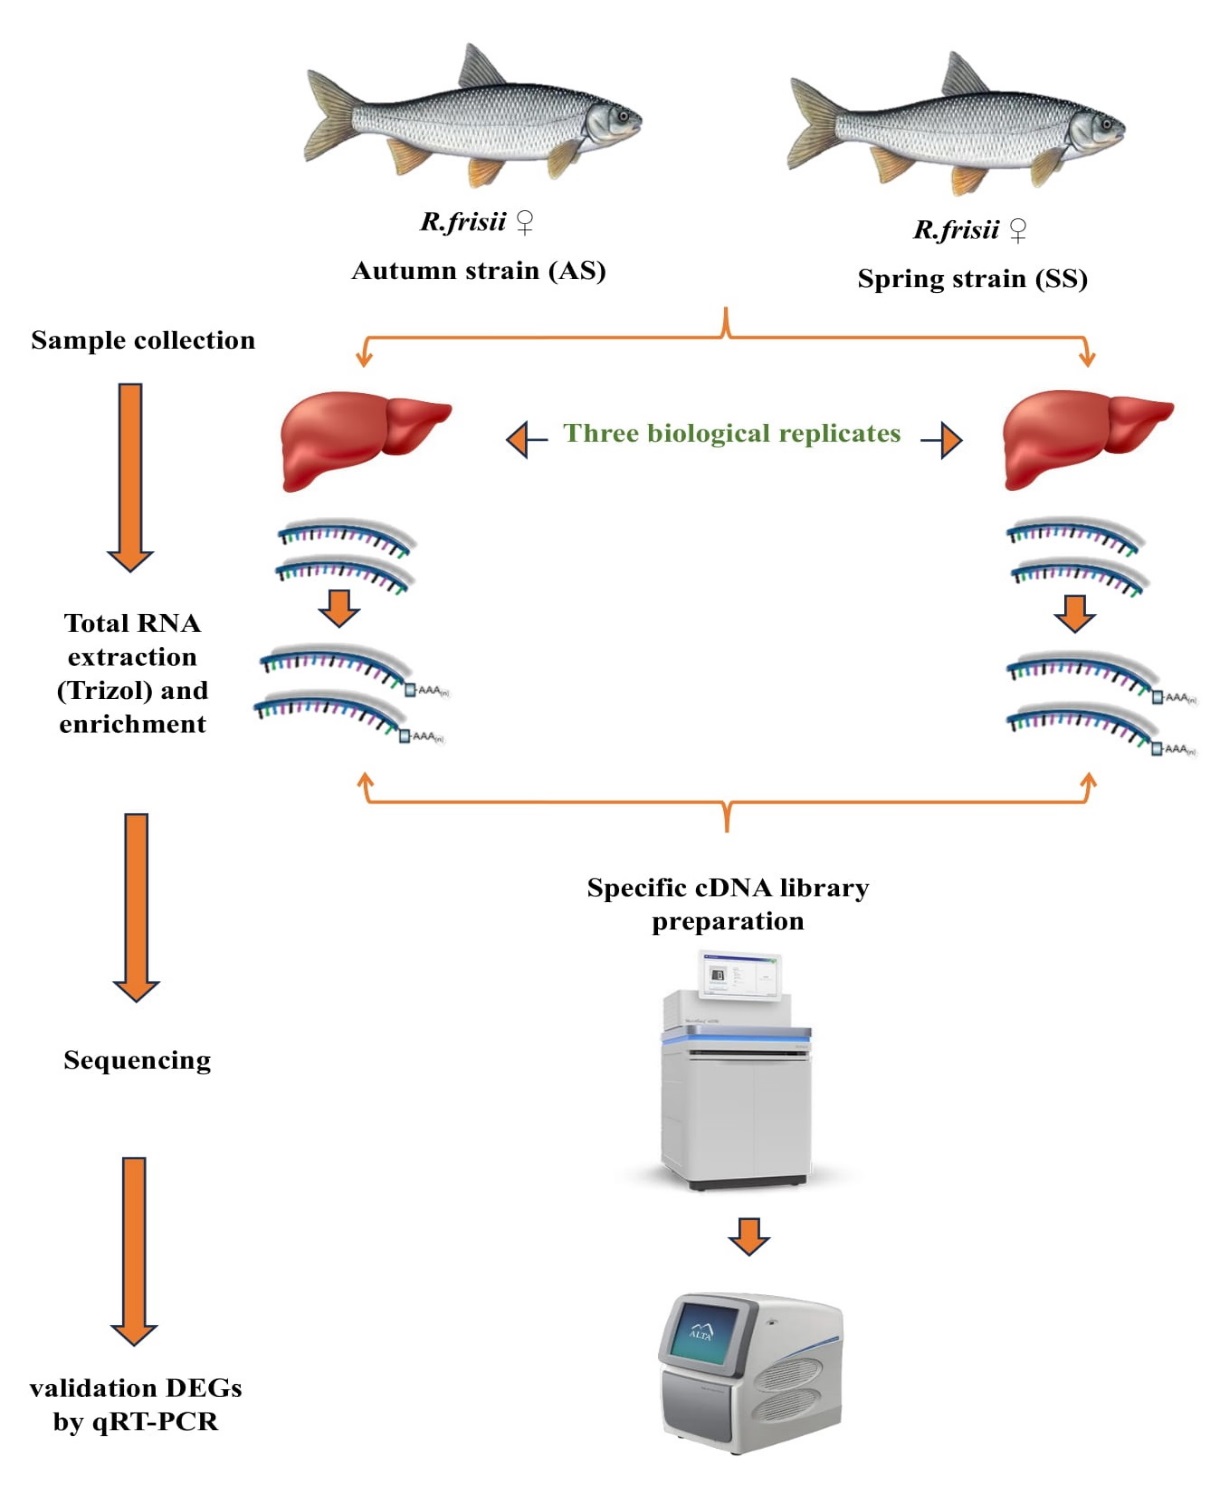
**

Fig S2. The workflow of de novo transcriptome data analysis for *R. frisii*.

Supplement: Supplementary file 3 [file 57ee5fcc3a1b8e05f3c85119.docx]

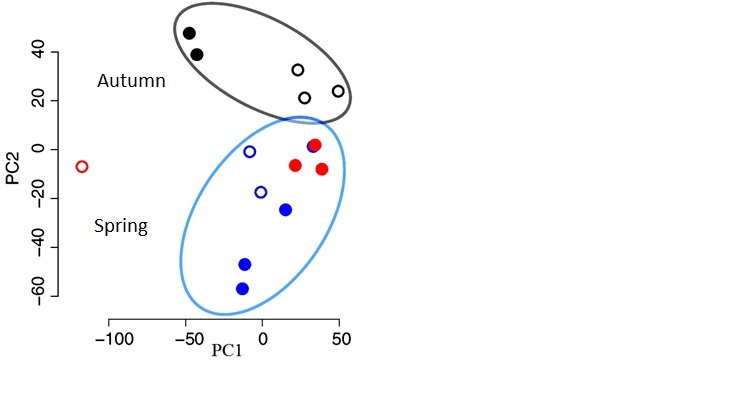


Fig S5: Principal components analysis (PCA) of RNA-seq dataset.

Supplement: Supplementary file 7 [file bc849e6b796477c5391b6bb8.docx]

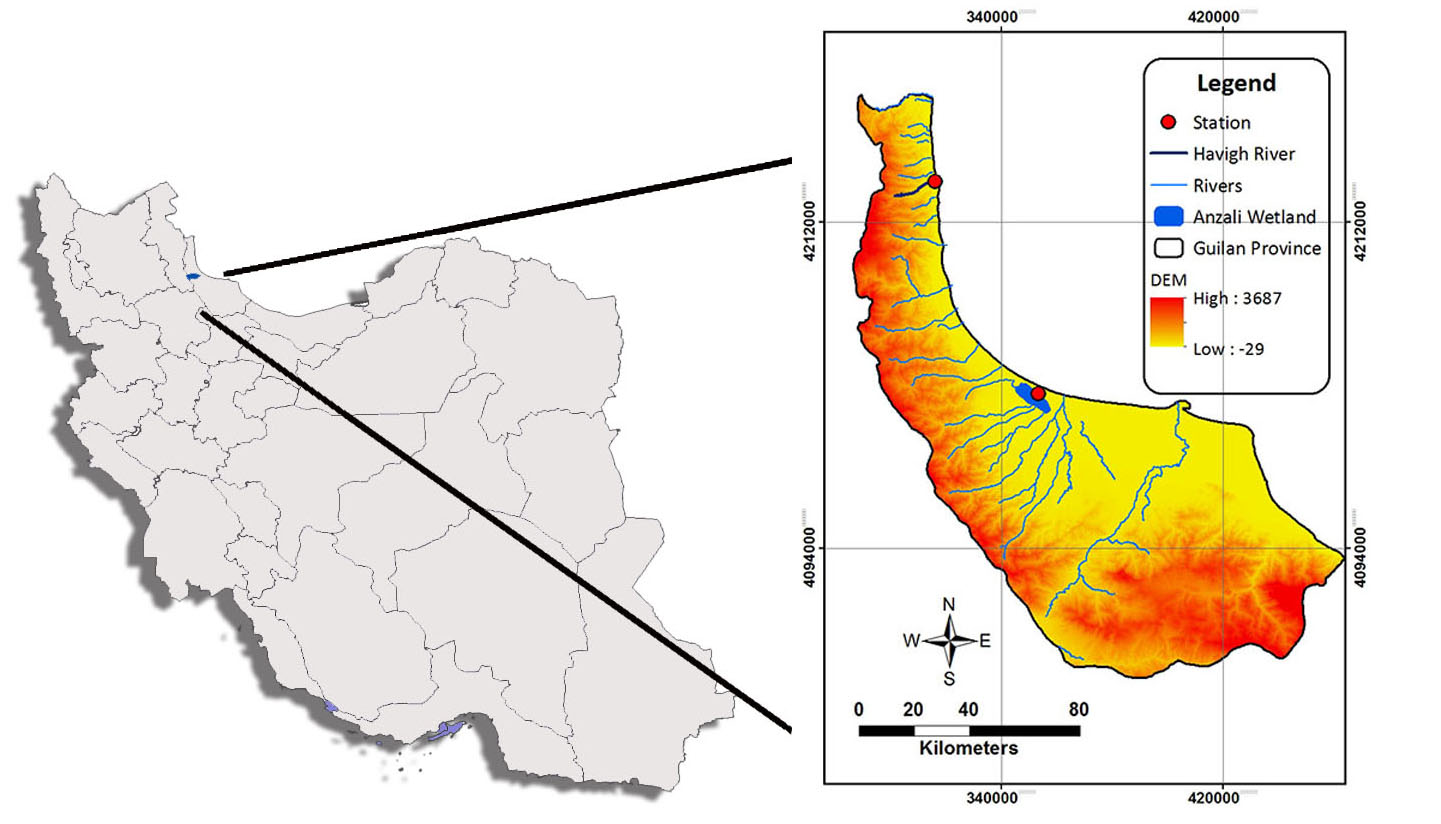


**Fig.S1:** Sampling stations for *R. frisii*.

Supplement: Supplementary file 9 [file e57482542e5984e6d850e332.docx]
